# Supplementary material for: A review on the structural characterization of nanomaterials for nano-QSAR models
Source: publisher site journal article supplement (doi:10.3762/bjnano.15.71), 2024-07-11
Supplement: Additional file 1 [file 2190-4286-15-71-S1.pdf]

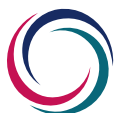

## Supporting Information

for

### **A review on the structural characterization of nanomaterials for nano-QSAR models**

Salvador Moncho, Eva Serrano-Candelas, Jesús Vicente de Julián-Ortiz and Rafael Gozalbes

*Beilstein J. Nanotechnol.* **2024**, *15*, 854–866. [doi:10.3762/bjnano.15.71](https://doi.org/10.3762/bjnano.15.71)

**All models evaluated in the review, as well as the classification of selected descriptors according to the proposed categories**

**List of contents:**

**Table S1:** List of models evaluated in the review, as well as the classification of selected descriptors according to the classification presented in this paper.

**Table S1:** List of models evaluated in the review, as well as the classification of selected descriptors according to the classification presented in this paper. Abbreviations used in the table: CN: coordination numbers; CNT: carbon nanotubes; Ei: energy of i (CB, conduction band; form, formation, VB, valence band);  $E_{l(w)}$ : descriptors calculated or from literature relating to pure elements (w if weighted for compounds); EC: descriptors based in the electron configuration; EN: descriptors related with electronegativity; Ful.: fullerenes; IS: Ionic strength in the reaction media; LDM: liquid drop model descriptors; Molec.: common molecular descriptors obtained from the SMILES for organic molecules;  $M_i$ : descriptor referring only to the metal atom; MOx: metal oxides (element among parenthesis if there is a single composition); NOM: Amount of organic matter in the test media; ON: oxidation number of the metal; Pr<sub>i</sub>: binary descriptor indicating the presence/absence of a component or experimental condition; PT: position in the periodic table, QDs: quantum dots; QM: descriptors calculated using electronic methods; S<sub>i</sub>: size of the nanomaterial described by its diameter (a subindex can be included referring to different methods or media); SA: surface area; SP: sedimentation potential (calculated); SPR: signaling-pathway responses; Target: the target cell is included as a descriptors (directly or by a perturbation method); R1 and R2: magnetic relaxivities; ZP: zeta potential; #<sub>i</sub>: count of atoms of element/type i.

| Reference          | Endpoint                                           | NM type  | Classification                |        |   |                                           |            |   |  |
|--------------------|----------------------------------------------------|----------|-------------------------------|--------|---|-------------------------------------------|------------|---|--|
|                    |                                                    |          | A                             | B      | C | D                                         | E          | F |  |
| [1] Hu, 2009       | LD <sub>50</sub> (cytotoxicity in <i>E. coli</i> ) | MOx      | $M_{charge}$                  |        |   |                                           |            |   |  |
| [2] Fourches, 2010 | Cellular uptake in PaCa2 human cells               | MOx (Fe) |                               | Molec. |   |                                           |            |   |  |
|                    | Toxicity vector in human cells (4 types)           | Mixed    |                               |        |   | S                                         |            |   |  |
| [3] Sayes, 2010    | Membrane damage in human lung cells (LDH test)     | MOx      |                               |        |   | $S_{STEM},$<br>$S_{Water},$<br>$S_{buff}$ | ZP, R1, R2 |   |  |
| [4] Burello, 2011b | Oxidative stress potential                         | MOx      | $M_{ON}$                      |        |   |                                           |            |   |  |
| [5] Liu, 2011      | Cytotoxicity in BEAS-2                             | MOx      | $\#_{M,O},$<br>$M_{mass}, PT$ |        |   |                                           |            |   |  |

| Reference          | Endpoint                                            | NM type  | Classification          |                                    |   |            |     |            |  |
|--------------------|-----------------------------------------------------|----------|-------------------------|------------------------------------|---|------------|-----|------------|--|
|                    |                                                     |          | A                       | B                                  | C | D          | E   | F          |  |
| [6] Puzyn, 2011    | pEC <sub>50</sub> (cytotoxicity in <i>E. coli</i> ) | MOx      | QM                      |                                    |   |            |     |            |  |
| [7] Rallo, 2011    | Luciferase in murine RAW cells                      | M/Mox    |                         |                                    |   |            | SPR |            |  |
| [8] Chau, 2012     | Cellular uptake in PaCa2 human cells                | MOx (Fe) |                         | Molec                              |   |            |     |            |  |
| [9] Epa, 2012      | Smooth cell apoptosis                               | Mixed    | Pr <sub>Fe2O3</sub>     | Pr <sub>Dextran</sub> ,<br>Acidity |   |            |     |            |  |
|                    | Cellular uptake (HUVEC/<br>PaCa2)                   | MOx (Fe) |                         | Molec.                             |   |            |     |            |  |
| [10] Patel, 2012   | Cytotoxicity in RAW and BEAS-2B cells               | Mixed    |                         |                                    |   |            |     |            |  |
| [11] Toropov, 2012 | pEC <sub>50</sub> (cytotoxicity in <i>E. coli</i> ) | MOx      |                         |                                    |   |            |     |            |  |
| [12] Ahmed, 2013   | pEC <sub>50</sub> (HIV-protease binding)            | Ful.     | QM                      | Molec.                             |   |            |     |            |  |
| [13] Liu, 2013a    | Cytotoxicity                                        | MOx      |                         |                                    | S | ZP, R1, R2 |     |            |  |
| [14] Liu, 2013b    | EZ metric (Zebrafish embryo)                        | Mixed    |                         |                                    |   |            |     | precursors |  |
| [15] Liu, 2013c    | Cytotoxicity in BEASE/RAW (MTS)                     | MOx      |                         |                                    |   |            |     |            |  |
| [16] Kar, 2014     | pEC <sub>50</sub> (cytotoxicity in <i>E. coli</i> ) | MOx      | EN, M <sub>charge</sub> |                                    |   |            |     |            |  |

| Reference                | Endpoint                                                     | NM type | Classification    |   |   |                                                            |                                              |   |                                                           |
|--------------------------|--------------------------------------------------------------|---------|-------------------|---|---|------------------------------------------------------------|----------------------------------------------|---|-----------------------------------------------------------|
|                          |                                                              |         | A                 | B | C | D                                                          | E                                            | F |                                                           |
| [17] Kleandrova, 2014    | Multiple: ecotoxicity and toxicity                           | M/MOx   | El <sub>(w)</sub> |   |   |                                                            |                                              |   |                                                           |
| [18] Liu, 2014           | 10 SPRs and 4 cytotoxicity indicators in RAW/BEAS-2B         | M/Mox   |                   |   |   |                                                            |                                              |   |                                                           |
| [19] Pathakoti, 2014     | pEC <sub>50</sub> (cytotoxicity in <i>E. coli</i> )          | MOx     | QM                |   |   | S <sub>STEM</sub> ,<br>S <sub>hydro</sub> , SA,<br>Mass, V | ZP <sub>water</sub> ,<br>ZP <sub>media</sub> |   | Pr <sub>Light</sub>                                       |
| [20] Singh, 2014         | several                                                      | Mixed   |                   |   |   |                                                            |                                              |   |                                                           |
| [21] Sizochenko, 2014    | pEC <sub>50</sub> (cytotoxicity in <i>E. coli</i> and HaCaT) | MOx     |                   |   |   | LDM                                                        |                                              |   |                                                           |
| [22] Toropov, 2014       | Mutagenicity (Ames test in TA100)                            | Ful.    |                   |   |   |                                                            |                                              |   | Pr <sub>S9</sub> ,<br>Pr <sub>Irradiation</sub> ,<br>Dose |
| [23] Venigalla, 2014     | pEC <sub>50</sub> (cytotoxicity in <i>E. coli</i> )          | MOx     |                   |   |   |                                                            |                                              |   |                                                           |
| [24] Gajewicz, 2015      | HaCaT                                                        | MOx     |                   |   |   |                                                            |                                              |   |                                                           |
| [25] Kaweeteerawat, 2015 | pEC <sub>50</sub> (cytotoxicity in <i>E. coli</i> )          | MOx     |                   |   |   |                                                            |                                              |   |                                                           |
| [26] Mikolajczyk, 2015   | Zeta Potential                                               | MOx     |                   |   |   |                                                            |                                              |   |                                                           |

| Reference             | Endpoint                                                     | NM type          | Classification                                    |                |   |                                     |                   |                                                      |
|-----------------------|--------------------------------------------------------------|------------------|---------------------------------------------------|----------------|---|-------------------------------------|-------------------|------------------------------------------------------|
|                       |                                                              |                  | A                                                 | B              | C | D                                   | E                 | F                                                    |
| [27] Sizochenko, 2015 | Cytotoxicity in BEASE/RAW (MTS)                              | MOx              |                                                   |                |   |                                     |                   |                                                      |
| [28] Toropov, 2015b   | Mutagenicity (Ames test in TA100)                            | Ful./CNT         |                                                   |                |   | Id                                  |                   | Pr <sub>S9</sub> ,<br>Pr <sub>incub.</sub> ,<br>Dose |
| [29] Toropov , 2015a  | Mutagenicity (Ames test in TA100)                            | CNT              |                                                   |                |   |                                     |                   | Pr <sub>S9</sub> ,<br>Pr <sub>incub.</sub> ,<br>Dose |
| [30] Toropova, 2015   | Cell viability (HK-2/LLC-PK1)                                | SiO <sub>2</sub> |                                                   | # <sub>M</sub> |   | S <sub>bin</sub>                    |                   | Dose, time                                           |
| [31] Cassano, 2016    | pEC <sub>25</sub> (WST-1) Several                            | SiO <sub>2</sub> |                                                   |                |   | S <sub>bin</sub> , R <sub>bin</sub> | ZP <sub>bin</sub> | Time, CL,                                            |
| [32] Jagiello, 2016   | HIV-protease binding                                         | Ful.             |                                                   |                |   |                                     |                   |                                                      |
| [33] Kar, 2016        | pEC <sub>50</sub> (cytotoxicity in <i>E. coli</i> and HaCaT) | MOx              |                                                   |                |   |                                     |                   |                                                      |
| [34] Le, 2016         | Cell viability/LDH                                           | MOx (Zn)         |                                                   |                |   |                                     |                   |                                                      |
| [35] Manganelli, 2016 | Cell viability in HEK cells                                  | SiO <sub>2</sub> |                                                   |                |   | S                                   |                   | Dose,<br>Time                                        |
| [36] Mu, 2016         | E.Coli                                                       | MOx              | EN,<br>M <sub>softness</sub> ,<br>M <sub>IP</sub> |                |   |                                     |                   |                                                      |

| Reference             | Endpoint                                                     | NM type          | Classification                                          |   |   |                  |    |                                               |
|-----------------------|--------------------------------------------------------------|------------------|---------------------------------------------------------|---|---|------------------|----|-----------------------------------------------|
|                       |                                                              |                  | A                                                       | B | C | D                | E  | F                                             |
| [37] Pan, 2016        | E. Coli / HaCaT                                              | MOx              |                                                         |   |   |                  |    |                                               |
| [38] Toropova, 2016a  | Mutagenicity (Ames test in TA100 and E. coli)                | Ful.             |                                                         |   |   |                  |    | Pr <sub>S9</sub> , Pr <sub>irrad</sub> , Dose |
| [39] Toropova, 2016b  | Mutagenicity (Ames test in TA100)                            | CNT              |                                                         |   |   |                  | Id | Pr <sub>S9</sub> , Dose                       |
| [40] Toropova, 2016c  | pEC <sub>50</sub> (cytotoxicity in <i>E. coli</i> and HaCaT) | MOx              | SMILES                                                  |   |   |                  |    | Target                                        |
| [41] Basant, 2017     | pEC <sub>50</sub> (cytotoxicity in <i>E. coli</i> and HaCaT) | MOx              | several                                                 |   |   |                  |    | Pr <sub>Light</sub> , Target                  |
| [42] Concu, 2017      | Toxicity (general)                                           | M/Mox            | El <sub>Volume</sub> , EN, El <sub>Polarizability</sub> |   |   | S, shape         |    | EC <sub>50_oth</sub> time                     |
| [43] Fjodorova, 2017  | pEC <sub>50</sub> (cytotoxicity to <i>E. coli</i> )          | MOx              | # <sub>M,O</sub> , EN, PT, M <sub>charge</sub>          |   |   |                  |    |                                               |
| [44] Manganelli, 2017 | Cell viability                                               | SiO <sub>2</sub> |                                                         |   |   | S <sub>bin</sub> |    | Dose, Time                                    |
| [45] Sizochenko, 2017 | Zebrafish Hatching Enzyme ZHE1                               | MOx              |                                                         |   |   |                  |    |                                               |
| [46] Zhou, 2017       | pEC <sub>50</sub> (cytotoxicity to <i>E. coli</i> )          | MOx              |                                                         |   |   |                  |    |                                               |

| Reference              | Endpoint                                                                       | NM type  | Classification                      |         |                           |    |                      |                                                               |
|------------------------|--------------------------------------------------------------------------------|----------|-------------------------------------|---------|---------------------------|----|----------------------|---------------------------------------------------------------|
|                        |                                                                                |          | A                                   | B       | C                         | D  | E                    | F                                                             |
| [47] Choi, 2018        | Cell viability several                                                         | MOx      | $E_{CB}, E_{VB}, \Delta H_f$        |         | $S_{TEM}, S_{DLS}$        |    |                      |                                                               |
| [48] De, 2018          | pEC <sub>50</sub> (cytotoxicity to <i>E. coli</i> /HaCaT) and % EI (Zebrafish) | MOx      | $M_{ON}, EN, Valence$               |         |                           |    | ToX <sub>other</sub> |                                                               |
| [49] Mikolajczyk, 2018 | pEC50 (cytotoxicity to CHO-K1)                                                 | MOx (Ti) | $M_{IP}, M_{EA}, M_{hard}, M_{ads}$ |         |                           |    |                      |                                                               |
| [50] Shin, 2018        | Immobilization <i>D. magna</i>                                                 | several  | EI, Several                         | Coating | $S_{TEM}, S_{agg}, Shape$ | ZP |                      | Pr <sub>Exp. cond</sub><br>Time, IS,<br>NOM,<br>Number<br>DM, |
| [51] Sizochenko, 2018  | pEC50 (several targets)                                                        | MOx      | $M_{ch}, E_{ion\_rad}, EN, E_{gap}$ |         | $R_{Wigner-Seitz}$        |    |                      |                                                               |
| [52] Trinh, 2018       |                                                                                | Ful.     |                                     |         |                           |    |                      |                                                               |
| [52] Buglak, 2019      | cell viability several                                                         | CNT      |                                     |         | $S, Lenght, Area$         |    |                      | Dose, Time<br>, CL,<br>Method                                 |
| [53] Cai, 2019         | EC50 ( <i>D. Magna</i> )                                                       | MOx (Ti) |                                     |         |                           |    |                      |                                                               |



| Reference              | Endpoint                                   | NM type  | Classification                        |                      |    |                                     |                            |   |             |
|------------------------|--------------------------------------------|----------|---------------------------------------|----------------------|----|-------------------------------------|----------------------------|---|-------------|
|                        |                                            |          | A                                     | B                    | C  | D                                   | E                          | F |             |
| [54] Choi, 2019        | % (cell viability in HaCaT and BEAS)       | MOx/Ag   | #elements                             |                      |    | S <sub>TEM</sub> , S <sub>DLS</sub> | Surface charge             |   | Assay, dose |
| [55] Kuz'min, 2019     | E.Coli/Hacat                               | MOx      | several                               |                      |    | LDM, S                              |                            |   |             |
| [56] Mikolajczyk, 2019 | pEC <sub>50</sub> (cytotoxicity on CHO-K1) | MOx (Ti) |                                       |                      | EN |                                     |                            |   |             |
|                        | Photodegradation of phenol                 | MOx (Ti) |                                       | % <sub>Pd</sub> , SP |    | S <sub>ABET</sub>                   |                            |   |             |
| [57] Ojha, 2019        | Cellular uptake in PaCa2/HUVEC/U937        | MOx (Fe) |                                       |                      |    |                                     |                            |   |             |
| [58] Ambure, 2020      | Cytotoxicity/Genotoxicity                  | MOx      |                                       | Molec                |    |                                     |                            |   |             |
| [59] Cao, 2020         | Cytotoxicity A549 cells                    | MOx      | M <sub>charge</sub> , M <sub>%w</sub> |                      |    |                                     |                            |   |             |
| [60] Halder, 2020      | Genotoxicity                               | MOx      | El <sub>(w)</sub>                     |                      |    |                                     |                            |   |             |
| [61] Huang, 2020       | Inflammatory potential IL1beta production  | MOx      |                                       |                      |    |                                     |                            |   |             |
| [62] Kotzabasaki, 2020 | Cell viability                             | FeOx     |                                       |                      |    |                                     |                            |   |             |
| [63] Kudrinskiy, 2020  | MIC ( <i>S. cerevisiae</i> )               | Ag       |                                       |                      |    | S, SA                               | ZP, C <sub>max</sub> , kPO |   |             |

| Reference                | Endpoint                                            | NM type  | Classification                             |                           |                                       |                            |                               |                                       |
|--------------------------|-----------------------------------------------------|----------|--------------------------------------------|---------------------------|---------------------------------------|----------------------------|-------------------------------|---------------------------------------|
|                          |                                                     |          | A                                          | B                         | C                                     | D                          | E                             | F                                     |
| [64] Papadiamantis, 2020 | Cell viability                                      | MOx      | Crystal, CN                                |                           | S, SA, TSA, Shydro,                   | ZP, PZZP,                  |                               | Assay                                 |
| [65] RybińskaFryca, 2020 | Photodegradation of phenol                          | MOx (Ti) |                                            | # <sub>N,C</sub>          | S <sub>BET</sub>                      |                            | Precursor (IL, cation, anion) |                                       |
|                          | pEC <sub>50</sub> (cytotoxicity to <i>E. coli</i> ) | MOx (Ti) |                                            | EN, M <sub>%mol</sub>     |                                       |                            |                               |                                       |
|                          | Zeta potential (in media)                           |          | HOMO/# <sub>M</sub>                        |                           | S <sub>TEM</sub>                      | ZP <sub>water</sub>        |                               |                                       |
| [66] Gul, 2021           | cell viability                                      | Several  |                                            |                           |                                       |                            | Synthesys method              |                                       |
| [67] Jung, 2021          | pLC <sub>50</sub> (fish)                            | Ag       |                                            |                           | S                                     | ZP, pLC <sub>50Daphn</sub> |                               |                                       |
| [68] Kumar, 2021         | cell viability                                      | QDs      |                                            |                           |                                       |                            |                               |                                       |
| [69] Qi, 2021            | pEC <sub>50</sub> (cytotoxicity to CHO-K1)          | MOx (Ti) |                                            | M <sub>mol_fraction</sub> |                                       |                            |                               |                                       |
| [70] Sifonte, 2021       | pEC <sub>50</sub> HaCaT                             | MOx      |                                            |                           |                                       |                            |                               |                                       |
| [71] Toropova, 2021      | Cell viability                                      | MOx      | Formula, H <sub>form</sub> , Ecb, Evb, EN. |                           | S <sub>TEM</sub> , S <sub>hydro</sub> |                            |                               | CL, Species, Origin, Cell-type, Time, |

| Reference           | Endpoint                                                 | NM type         | Classification          |    |                                         |                   |       |             |
|---------------------|----------------------------------------------------------|-----------------|-------------------------|----|-----------------------------------------|-------------------|-------|-------------|
|                     |                                                          |                 | A                       | B  | C                                       | D                 | E     | F           |
| [72] Varsou, 2021   | Immobilization of <i>D. Magna</i>                        | Ag/MOx (Ti)     |                         |    | STEM, SDLS,                             | ZP, Cond. EI Mob. | Aging | Dose, Assay |
| [73] Yuan, 2021     | Cell proliferation rate HK2                              | M+MOx (Ti)      |                         |    |                                         |                   |       |             |
| [74] Zhang, 2021    | Interaction energy (calculated) with SARS-CoV-2 proteins | Ful./CNT/Graph. |                         |    | D, L, SA, Angle                         |                   |       |             |
| [75] Shin, 2021     | Cell viability in human lung cells                       | MOx (Ti)        | EC                      | EC |                                         |                   |       |             |
| [76] Banerjee, 2023 | pEC <sub>50</sub> (cytotoxicity to CHO-K1)               | MOx (Ti)        | EN, EA, ΔH <sub>f</sub> |    | SA                                      |                   |       |             |
| [77] Na, 2023       | EC <sub>10/50</sub> (toxicity to <i>A. fischeri</i> )    | MOx             |                         |    | S <sub>NM</sub> , S <sub>DLs</sub> , SA | ZP                |       |             |

## References

1. Hu, X.; Cook, S.; Wang, P.; Hwang, H. *Science of the Total Environment* **2009**, *407*, 3070–3072, doi:10.1016/j.scitotenv.2009.01.033
2. Fourches, D.; Pu, D.; Tassa, C.; Weissleder, R.; Shaw, S.Y.; Mumper, R.J.; Tropsha, A. *ACS Nano* **2010**, *4*, 5703–5712, doi:10.1021/nn1013484
3. Sayes, C.; Ivanov, I. , doi:10.1111/j.1539-6924.2010.01438.x
4. Burello, E.; Worth, A.P. *Nanotoxicology* **2011**, *5*, 228–235, doi:10.3109/17435390.2010.502980
5. Liu, R.; Rallo, R.; George, S.; Ji, Z.; Nair, S.; Nel, A.E.; Cohen, Y. *Small* **2011**, *7*, doi:10.1002/smll.201002366
6. Puzyn, T.; Rasulev, B.; Gajewicz, A.; Hu, X.; Dasari, T.P.; Michalkova, A.; Hwang, H.M.; Toropov, A.; Leszczynska, D.; Leszczynski, J. *Nat Nanotechnol* **2011**, *6*, 175–178, doi:10.1038/nnano.2011.10
7. Rallo, R.; France, B.; Liu, R.; Nair, S.; George, S.; Damoiseaux, R.; Giralt, F.; Nel, A.; Bradley, K.; Cohen, Y. *Environ Sci Technol* **2011**, *45*, 1695–1702, doi:10.1021/ES103606X/SUPPL\_FILE/ES103606X\_SI\_001.PDF
8. Chau, Y.T.; Yap, C.W. *RSC Adv* **2012**, *2*, 8489–8496, doi:10.1039/c2ra21489j
9. Epa, V.C.; Burden, F.R.; Tassa, C.; Weissleder, R.; Shaw, S.; Winkler, D.A. *Nano Lett* **2012**, *12*, 5808–5812, doi:10.1021/nl303144k
10. Patel, T.R. Ph.D. Thesis: Bayesian Methods in the Quantitative Risk Assessment and Toxicity Profiling of Engineered Nanomaterials, University of California Los Angeles, 2012
11. Toropov, A.A.; Toropova, A.P.; Benfenati, E.; Gini, G.; Puzyn, T.; Leszczynska, D.; Leszczynski, J. *Chemosphere* **2012**, *89*, 1098–1102, doi:10.1016/j.chemosphere.2012.05.077
12. Ahmed, L.; Rasulev, B.; Turabekova, M.; Leszczynska, D.; Leszczynski, J. *Org Biomol Chem* **2013**, *11*, doi:10.1039/c3ob40878g
13. Liu, R.; Rallo, R.; Weissleder, R.; Tassa, C.; Shaw, S.; Cohen, Y. *Small* **2013**, *9*, 1842–1852, doi:10.1002/smll.201201903
14. Liu, X.; Tang, K.; Harper, S.; Harper, B.; Steevens, J.A.; Xu, R. *Int J Nanomedicine* **2013**, *8*, 31–43, doi:10.2147/IJN.S40742
15. Liu, R.; Zhang, H.Y.; Ji, Z.X.; Rallo, R.; Xia, T.; Chang, C.H.; Nel, A.; Cohen, Y. *Nanoscale* **2013**, *5*, 5644–5653, doi:10.1039/C3NR01533E
16. Kar, S.; Gajewicz, A.; Puzyn, T.; Roy, K.; Leszczynski, J. *Ecotoxicol Environ Saf* **2014**, *107*, 162–169, doi:10.1016/j.ecoenv.2014.05.026
17. Kleandrova, V. V.; Luan, F.; González-Díaz, H.; Ruso, J.M.; Speck-Planche, A.; Cordeiro, M.N.D.S. *Environ Sci Technol* **2014**, *48*, 14686–14694, doi:10.1021/es503861x
18. Liu, R.; France, B.; George, S.; Rallo, R.; Zhang, H.; Xia, T.; Nel, A.E.; Bradley, K.; Cohen, Y. *Analyst* **2014**, *139*, 943–953, doi:10.1039/C3AN01409F
19. Pathakoti, K.; Huang, M.J.; Watts, J.D.; He, X.; Hwang, H.M. *J Photochem Photobiol B* **2014**, *130*, 234–240, doi:10.1016/j.jphotobiol.2013.11.023

20. Singh, K.P.; Gupta, S. *RSC Advances* **2014**, *4*, 13215–13230
21. Sizochenko, N.; Rasulev, B.; Gajewicz, A.; Kuz'Min, V.; Puzyn, T.; Leszczynski, J. *Nanoscale* **2014**, *6*, doi:10.1039/c4nr03487b
22. Toropov, A.A.; Toropova, A.P. *Chemosphere* **2014**, *104*, 262–264, doi:10.1016/j.chemosphere.2013.10.079
23. Venigalla, S.; Dhail, S.; Ranjan, P.; Jain, S.; Chakraborty, T. *Former: Ann. West Univ. Timisoara-Series Chem* **2014**, *23*, 123–130
24. Gajewicz, A.; Schaeublin, N.; Rasulev, B.; Hussain, S.; Leszczynska, D.; Puzyn, T.; Leszczynski, J. *Nanotoxicology* **2015**, *9*, 313–325, doi:10.3109/17435390.2014.930195
25. Kaweeteerawat, C.; Ivask, A.; Liu, R.; Zhang, H.; Chang, C.H.; Low-Kam, C.; Fischer, H.; Ji, Z.; Pokhrel, S.; Cohen, Y.; et al. *Environ Sci Technol* **2015**, *49*, 1105–1112, doi:10.1021/es504259s
26. Mikolajczyk, A.; Gajewicz, A.; Rasulev, B.; Schaeublin, N.; Maurer-Gardner, E.; Hussain, S.; Leszczynski, J.; Puzyn, T. *Chemistry of Materials* **2015**, *27*, 2400–2407, doi:10.1021/cm504406a
27. Sizochenko, N.; Rasulev, B.; Gajewicz, A.; Mokshyna, E.; Kuz'min, V.E.; Leszczynski, J.; Puzyn, T. *RSC Adv* **2015**, *5*, 77739–77745, doi:10.1039/C5RA11399G
28. Toropov, A.A.; Toropova, A.P. *Chemosphere* **2015**, *139*, 18–22, doi:10.1016/j.chemosphere.2015.05.042
29. Toropov, A.A.; Toropova, A.P. *Chemosphere* **2015**, *124*, 40–46, doi:10.1016/j.chemosphere.2014.10.067
30. Toropova, A.P.; Toropov, A.A.; Benfenati, E. *SAR QSAR Environ Res* **2015**, *26*, 29–40, doi:10.1080/1062936X.2014.984327
31. Cassano, A.; Robinson, R.L.M.; Palczewska, A.; Puzyn, T.; Gajewicz, A.; Tran, L.; Manganelli, S.; Cronin, M.T.D. *ATLA Alternatives to Laboratory Animals* **2016**, *44*, doi:10.1177/026119291604400603
32. Jagiello, K.; Grzonkowska, M.; Swirog, M.; Ahmed, L.; Rasulev, B.; Avramopoulos, A.; Papadopoulos, M.G.; Leszczynski, J.; Puzyn, T. *Journal of Nanoparticle Research* **2016**, *18*, doi:10.1007/s11051-016-3564-1
33. Kar, S.; Gajewicz, A.; Roy, K.; Leszczynski, J.; Puzyn, T. *Ecotoxicol Environ Saf* **2016**, *126*, 238–244, doi:10.1016/j.ecoenv.2015.12.033
34. Le, T.C.; Yin, H.; Chen, R.; Chen, Y.; Zhao, L.; Casey, P.S.; Chen, C.; Winkler, D.A. *Small* **2016**, *12*, 3568–3577, doi:10.1002/SMLL.201600597
35. Manganelli, S.; Leone, C.; Toropov, A.A.; Toropova, A.P.; Benfenati, E. *Chemosphere* **2016**, *144*, 995–1001, doi:10.1016/J.CHEMOSPHERE.2015.09.086
36. Mu, Y.; Wu, F.; Zhao, Q.; Ji, R.; Qie, Y.; Zhou, Y.; Hu, Y.; Pang, C.; Hristozov, D.; Giesy, J.P.; et al. *Nanotoxicology* **2016**, *10*, 1207–1214, doi:10.1080/17435390.2016.1202352
37. Pan, Y.; Li, T.; Cheng, J.; Telesca, D.; Zink, J.I.; Jiang, J. *RSC Adv* **2016**, *6*, 25766–25775, doi:10.1039/C6RA01298A
38. Toropova, A.P.; Toropov, A.A.; Veselinović, A.M.; Veselinović, J.B.; Benfenati, E.; Leszczynska, D.; Leszczynski, J. *Ecotoxicol Environ Saf* **2016**, *124*, 32–36, doi:10.1016/j.ecoenv.2015.09.038
39. Toropova, A.P.; Toropov, A.A.; Rallo, R.; Leszczynska, D.; Leszczynski *Int. J. Environ. Res* **2016**, *10*, 59–64

40. Toropova, A.P.; Toropov, A.A.; Manganelli, S.; Leone, C.; Baderna, D.; Benfenati, E.; Fanelli, R. *NanoImpact* **2016**, *1*, 60–64, doi:10.1016/j.impact.2016.04.003
41. Basant, N.; Gupta, S. *Nanotoxicology* **2017**, *11*, 339–350, doi:10.1080/17435390.2017.1302612
42. Concu, R.; Kleandrova, V. V.; Speck-Planche, A.; Cordeiro, M.N.D.S. <http://dx.doi.org/10.1080/17435390.2017.1379567> **2017**, *11*, 891–906, doi:10.1080/17435390.2017.1379567
43. Fjodorova, N.; Novic, M.; Gajewicz, A.; Rasulev, B. *Nanotoxicology* **2017**, *11*, 475–483, doi:10.1080/17435390.2017.1310949
44. Manganelli, S.; Benfenati, E. *Methods in Molecular Biology* **2017**, *1601*, 275–290, doi:10.1007/978-1-4939-6960-9\_22/FIGURES/6
45. Sizochenko, N.; Leszczynska, D.; Leszczynski, J. *Nanomaterials* **2017**, *7*, doi:10.3390/nano7100330
46. Zhou, Z.; Tang, X.; Dai, W.; Shi, J.; Chen, H. *Can J Chem* **2017**, *95*, 863–866, doi:10.1139/cjc-2017-0172
47. Choi, J.S.; Ha, M.K.; Trinh, T.X.; Yoon, T.H.; Byun, H.G. *Sci Rep* **2018**, *8*, doi:10.1038/s41598-018-24483-z
48. De, P.; Kar, S.; Roy, K.; Leszczynski, J. *Environ Sci Nano* **2018**, *5*, doi:10.1039/C8EN00809D
49. Mikolajczyk, A.; Gajewicz, A.; Mulkiewicz, E.; Rasulev, B.; Marchelek, M.; Diak, M.; Hirano, S.; Zaleska-Medynska, A.; Puzyn, T. *Environ Sci Nano* **2018**, *5*, doi:10.1039/c8en00085a
50. Shin, H.K.; Seo, M.; Shin, S.E.; Kim, K.Y.; Park, J.W.; No, K.T. *Environ Sci Nano* **2018**, *5*, 765–775, doi:10.1039/c7en01127j
51. Sizochenko, N.; Mikolajczyk, A.; Jagiello, K.; Puzyn, T.; Leszczynski, J.; Rasulev, B. *Nanoscale* **2018**, *10*, 582–591, doi:10.1039/C7NR05618D
52. Trinh, T.X.; Choi, J.S.; Jeon, H.; Byun, H.G.; Yoon, T.H.; Kim, J. *Chem Res Toxicol* **2018**, *31*, 183–190, doi:10.1021/acs.chemrestox.7b00303
53. Cai, Y.; Nowack, B.; Wigger, H. *NanoImpact* **2019**, *15*, doi:10.1016/j.impact.2019.100180
54. Choi, J.S.; Trinh, T.X.; Yoon, T.H.; Kim, J.; Byun, H.G. *Chemosphere* **2019**, *217*, 243–249, doi:10.1016/j.chemosphere.2018.11.014
55. Kuz'min, V.E.; Ognichenko, L.N.; Sizochenko, N.; Chapkin, V.A.; Stelmakh, S.I.; Shyrykalova, A.O.; Leszczynski, J. *International Journal of Quantitative Structure-Property Relationships* **2018**, *4*, 28–40, doi:10.4018/ijqspr.2019010103
56. Mikolajczyk, A.; Sizochenko, N.; Mulkiewicz, E.; Malankowska, A.; Rasulev, B.; Puzyn, T. *Nanoscale* **2019**, *11*, 11808–11818, doi:10.1039/C9NR01162E
57. Ojha, P.K.; Kar, S.; Roy, K.; Leszczynski, J. *Nanotoxicology* **2019**, *13*, 14–34, doi:10.1080/17435390.2018.1529836
58. Ambure, P.; Ballesteros, A.; Huertas, F.; Camilleri, P.; Barigye, S.J.; Gozalbes, R. *International Journal of Quantitative Structure-Property Relationships* **2020**, *5*, 83–100, doi:10.4018/ijqspr.20201001.0a2
59. Cao, J.; Pan, Y.; Jiang, Y.; Qi, R.; Yuan, B.; Jia, Z.; Jiang, J.; Wang, Q. *Green Chemistry* **2020**, *22*, 3512–3521, doi:10.1039/d0gc00933d
60. Halder, A.K.; Melo, A.; Cordeiro, M.N.D.S. *Chemosphere* **2020**, *244*, doi:10.1016/j.chemosphere.2019.125489

61. Huang, Y.; Li, X.; Xu, S.; Zheng, H.; Zhang, L.; Chen, J.; Hong, H.; Kusko, R.; Li, R. *Environ Health Perspect* **2020**, *128*, 1–13, doi:10.1289/EHP6508
62. Kotzabasaki, M.I.; Sotiropoulos, I.; Sarimveis, H. *RSC Adv* **2020**, *10*, 5385–5391, doi:10.1039/c9ra09475j
63. Kudrinskiy, A.; Zherebin, P.; Gusev, A.; Shapoval, O.; Pyee, J.; Lisichkin, G.; Krutyakov, Y. *Nanomaterials* **2020**, *10*, 1–22, doi:10.3390/nano10081459
64. Papadiamantis, A.G.; Jänes, J.; Voyiatzis, E.; Sikk, L.; Burk, J.; Burk, P.; Tsoumanis, A.; Ha, M.K.; Yoon, T.H.; Valsami-Jones, E.; et al. *Nanomaterials* **2020**, *10*, 1–19, doi:10.3390/nano10102017
65. Rybińska-Fryca, A.; Mikolajczyk, A.; Puzyn, T. *Nanoscale* **2020**, *12*, 20669–20676, doi:10.1039/d0nr05220e
66. Gul, G.; Yildirim, R.; Ileri-Ercan, N. *Environ Sci Nano* **2021**, *8*, 937–949, doi:10.1039/D0EN01240H
67. Jung, U.; Lee, B.; Kim, G.; Shin, H.K.; Kim, K.T. *Chemosphere* **2021**, *283*, doi:10.1016/j.chemosphere.2021.131164
68. Kumar, A.; Kumar, P. *J Hazard Mater* **2021**, *402*, 123777, doi:10.1016/J.JHAZMAT.2020.123777
69. Qi, R.; Pan, Y.; Cao, J.; Yuan, B.; Wang, Y.; Jiang, J. *Environ Sci Nano* **2021**, *8*, 927–936, doi:10.1039/D0EN01266A
70. Peláez Sifonte, E.; Antonio Castro-Smirnov, F.; Adrian Soutelo Jimenez, A.; Raúl González Diez, H.; Guzmán Martínez, F. *Journal of Nanoparticle research* **2021**, *23*, 161, doi:10.1007/s11051-021-05288-0
71. Toropova, A.P.; Toropov, A.A.; Leszczynski, J.; Sizochenko, N. *Environ Toxicol Pharmacol* **2021**, *86*, doi:10.1016/j.etap.2021.103665
72. Varsou, D.D.; Ellis, L.J.A.; Afantitis, A.; Melagraki, G.; Lynch, I. *Chemosphere* **2021**, *285*, doi:10.1016/j.chemosphere.2021.131452
73. Yuan, B.; Wang, P.; Sang, L.; Gong, J.; Pan, Y.; Hu, Y. *Ecotoxicol Environ Saf* **2021**, *208*, doi:10.1016/j.ecoenv.2020.111634
74. Zhang, F.; Wang, Z.; Vijver, M.G.; Peijnenburg, W.J.G.M. *Ecotoxicol Environ Saf* **2021**, *219*, doi:10.1016/j.ecoenv.2021.112357
75. Shin, H.K.; Kim, S.; Yoon, S. *NanoImpact* **2021**, *21*, 100298, doi:10.1016/J.IMPACT.2021.100298
76. Banerjee, A.; Kar, S.; Pore, S.; Roy, K. <https://doi.org/10.1080/17435390.2023.2186280> **2023**, *17*, 78–93, doi:10.1080/17435390.2023.2186280
77. Na, M.; Nam, S.H.; Moon, K.; Kim, J. *Environ Sci Nano* **2023**, *10*, 325–337, doi:10.1039/D2EN00672C
